Letters: Discoveries

# Balancing selection drives maintenance of genetic variation in *Drosophila* antimicrobial peptides

Joanne R. Chapman<sup>1†</sup>, Tom Hill<sup>1†</sup>, Robert L. Unckless<sup>1\*</sup>

<sup>1</sup>Department of Molecular Biosciences, University of Kansas, Lawrence, Kansas, USA

† These authors contributed equally to the work

\* unckless@ku.edu

2018-03-19

**Keywords:** Balancing selection, antimicrobial peptides (AMPs), population genetics, immunity, coevolution, *Drosophila*.

The *Drosophila* sequence data were obtained from John Pool's *Drosophila* Genome Nexus (<http://www.johnpool.net/genomes.html>).

1 **Abstract**

2 Genes involved in immune defense against pathogens provide some of the most well-  
3 known examples of both directional and balancing selection. Antimicrobial peptides  
4 (AMPs) are innate immune effector genes, playing a key role in pathogen clearance in  
5 many species, including *Drosophila*. Conflicting lines of evidence have suggested AMPs  
6 may be under directional, balancing or purifying selection. Here, we use a case-control  
7 gene approach to show that balancing selection is an important force shaping AMP  
8 diversity in two species of *Drosophila*. In *D. melanogaster*, this is most clearly observed  
9 in ancestral African populations. Furthermore, the signature of balancing selection is  
10 even clearer once background selection has been accounted for. Balancing selection  
11 also acts on AMPs in *D. mauritiana*, an isolated island endemic separated from *D.*  
12 *melanogaster* by about 4 million years of evolution. This suggests that balancing  
13 selection may be acting to maintain adaptive diversity in AMPs in insects as it does  
14 in other taxa.

15 **1 Introduction**

16 Pathogens exert strong selective pressures on their hosts, both in terms of individual  
17 fitness and the evolutionary trajectory of populations and species. Co-evolutionary  
18 dynamics of hosts and pathogens results in continual selection for adaptive improve-  
19 ments in both players, often referred to as a co-evolutionary arms race (1, 2, 3). As  
20 a consequence, genes involved in immune defense tend to undergo strong positive se-  
21 lection, such that they are among the fastest evolving genes in the genomes of many  
22 hosts (4, 5, 6, 7, 8).

23 However, resistance mutations may not always become fixed. Balancing selec-  
24 tion is the process whereby polymorphism is adaptively maintained within genes over  
25 extended timescales, sometimes described as trench-warfare dynamics (9). Several  
26 processes are thought to contribute to balancing selection (reviewed in (10)). These  
27 include heterozygote advantage, whereby individuals heterozygous at a given locus  
28 have a fitness advantage over either homozygote; negative frequency dependent se-  
29 lection, whereby the benefit of an allele increases the rarer it is in a population; and  
30 selection varying in a context-dependent manner, for example at different spatial or  
31 temporal scales, between the sexes, or in the presence or absence of infection. Bal-  
32 ancing selection can be detected as an excess of intermediate frequency variants and  
33 a region of increased polymorphism around the selected site. The extent to which  
34 selection will impact genetic variation within and around immune genes will depend  
35 on a number of factors, including: the timescale upon which selection is acting (11);  
36 the density, diversity and virulence of pathogens (12); the cost of maintaining resis-  
37 tance alleles in the absence of infection (13); effective population size, mutation and

38 recombination rates of hosts and pathogens (14); environmental variables (15); and  
39 demographic factors such as gene flow and bottlenecks (16).

40 The dynamic selective pressures exerted by pathogens promote balanced poly-  
41 morphism of host immune genes in several cases. Perhaps the best documented ex-  
42 ample is the major histocompatibility complex (MHC) in vertebrates (reviewed in  
43 (17, 18, 19, 20)). Individuals tend to be heterozygous at MHC loci, and large numbers  
44 of MHC alleles are maintained in populations. Other examples of balancing selection  
45 acting on host immune genes in animals include toll-like receptors (TLRs) in humans  
46 (21), red deer (22) and birds (23, 24); various cytokine genes (particularly interleukins)  
47 in humans (21, 25, 26, 27), birds (28, 29, 30) and voles (31); and viral resistance genes  
48 including *Oas1b* in mice (32), *OAS1* in primates (33, 34) and *TRIM5* in humans (35)  
49 and primates (36). Balancing selection also appears to play a role in the evolution  
50 of antimicrobial peptides (AMPs). AMPs are effectors of innate immunity that are  
51 strongly induced upon infection (37, 38). They tend to be membrane active (39, 40),  
52 with a direct role in killing and/or impeding the growth of pathogens (41, 42). Bal-  
53 ancing selection has been implicated as a driver of AMP evolution in a diverse array of  
54 species including birds (43, 44), amphibians (45), fish (46), molluscs (47) and humans  
55 (48, 49).

56 The fruit fly, *Drosophila melanogaster*, is an important model for understanding  
57 evolution of the immune system (50, 51, 52, 53, 54). Directional selection on *Drosophila*  
58 immune genes appears to be a relatively widespread phenomenon, especially amongst  
59 receptor and signaling genes (55, 56, 57, 58, 59, 60). In contrast, evidence for balancing  
60 selection acting on *Drosophila* immune genes has been more equivocal. Genome-wide  
61 scans by Croze and colleagues (61, 62) found little evidence for balancing selection  
62 acting on immune genes in general, and Obbard *et al.* (58) found no evidence for  
63 adaptive evolution of AMPs. In contrast, both single gene and genome-wide analyses  
64 of selection have indicated that balancing selection (13, 63) or diversifying selection  
65 (64) may play an important role in the evolution of AMPs in *Drosophila*. Additionally,  
66 recent analyses have shown that seasonal fluctuations in temperate can cause rapid  
67 oscillations in *D. melanogaster* allele frequencies (65), particularly in immune genes,  
68 including AMPs (66, 67).

69 Insects and other invertebrates lack an adaptive immune system, so AMPs play  
70 a key role in controlling pathogen load and infection outcome (41, 42). Given their  
71 direct interaction with pathogens, it is surprising that AMPs do not show signatures  
72 of recurrent adaptive substitutions. We hypothesize that AMPs in insects are prone  
73 to balancing selection. To test this hypothesis, we examined AMP variation in four  
74 populations of *Drosophila melanogaster* and one population of *Drosophila mauritiana*.  
75 Using a case-control gene approach, we searched for molecular evolutionary signatures  
76 of selection. Our results provide evidence that balancing selection is an important

77 driver of AMP evolution.

## 78 2 Results

### 79 2.1 Genetic variation across four *Drosophila melanogaster* pop- 80 ulations

81 To determine whether AMPs show signatures of balancing selection, we examined nu-  
82 cleotide polymorphism data in *D. melanogaster* populations. Coding sequence align-  
83 ments for 13494 genes (including 35 AMPs and 104 immunity genes) were obtained  
84 (68) for four *D. melanogaster* populations: Zambia (ZI), Rwanda (RG), France (FR),  
85 and North Carolina (DGRP) (see Materials and Methods, Supplementary Table 1).  
86 *D. melanogaster* originated in Sub-Saharan Africa, expanded into Europe approxi-  
87 mately 15-16,000 years ago, and subsequently spread to North America less than 200  
88 years ago (69, 70, 71). The ZI and RG lines therefore represent ancestral populations,  
89 whereas FR and DGRP are derived populations.

90 We calculated three population genetic statistics: Watterson's  $\theta$  (the sample size  
91 corrected number of segregating sites),  $\pi$  (pairwise nucleotide diversity) and Tajima's  
92 D. Consistent with balancing selection occurring in AMPs, the mean Tajima's D for  
93 AMPs is higher than the average across autosomes for Zambia (ZI, -0.713 AMPs  
94 versus -1.168 autosome average), Rwanda (RG, -0.358 versus -0.503), France (FR,  
95 0.033 versus -0.021), and the DGRP (-0.171 versus -0.179, Supplementary Table 2).  
96 As observed previously (e.g. (72, 73)), the autosome-wide average for Tajima's D is  
97 quite negative in *D. melanogaster*, which likely reflects a complex demographic history.  
98 In general, a significantly higher proportion of AMPs have a positive Tajima's D when  
99 compared to other genes on autosomes (Supplementary Table 3;  $\chi^2$   $p$ -value < 0.02 for  
100 all populations except France where  $\chi^2$   $p$ -value = 0.36).

### 101 2.2 Case-control tests for balancing selection in *Drosophila*

102 Given the apparent differences in selection between AMPs and the genome averages  
103 described above, we employed a case-control approach to test whether AMPs showed  
104 signatures of balancing selection while controlling for local variation in mutation and  
105 recombination rates. For each AMP, we randomly sampled genes of similar length  
106 (amino acid sequence length  $\leq 10$  times the size of the AMP) and position (within  
107 100kb on either side), calculated statistics for the AMP and control gene, and then  
108 calculated the mean difference over the 35 AMP/control comparisons. We repeated  
109 this 10000 times to obtain an empirical distribution of differences (Figure 1). In these  
110 instances, a positive difference suggests a higher value for AMPs versus the control  
111 gene, and therefore a role for balancing selection. These differences are primarily pos-

### 2.3 Accounting for background selection strengthens the signature of balancing selection on *Drosophila* AMPs

2 RESULTS

112 itive for both  $\pi$  and Watterson's  $\theta$  for all populations (Figure 1B-C, Table 1). For  
113 Tajima's D, the differences are positive for Zambia and Rwanda (ancestral popula-  
114 tions), supporting balancing selection, but close to zero for France and negative for  
115 the DGRP (derived populations, Figure 1A, Table 1).

116 To identify if these signatures of balancing selection are unique to AMPs, or con-  
117 sistent across all immunity genes, we repeated all tests, this time for all non-AMP  
118 immunity genes. We found very little evidence of balancing or directional selection  
119 across the remaining immunity genes, with differences closer to zero (Supplementary  
120 Tables 2 and 4, Figure S1). This result is in general concordance with those of Croze  
121 *et al* (61, 62).

122 It is possible that the observed signature of balancing selection amongst AMPs  
123 is due to various sampling artifacts. First, AMP families tend to occur in clusters  
124 throughout the genome, so it is possible that including all AMPs in the analyses  
125 effectively counts the same selective event multiple times. To account for this, we  
126 subsampled 10 unlinked (>5kb apart) AMPs and repeated our analyses. This did  
127 not qualitatively change our results (Supplementary Figure 2). Second, the presence  
128 of the selfish genetic element *Segregation Distorter* (*SD*), a low-frequency autosomal  
129 meiotic drive element (74) on the second chromosome, in some lines (4% in both  
130 Zambia and France) may influence our results. However, removing these lines did not  
131 qualitatively change our results (Supplementary Table 5, Supplementary Figure 3).  
132 We therefore consider that the observed patterns reflect true underlying evolutionary  
133 processes rather than sampling artifacts.

### 134 2.3 Accounting for background selection strengthens the sig- 135 nature of balancing selection on *Drosophila* AMPs

136 Background selection, the removal neutral variation due to selection against linked  
137 deleterious alleles, can influence levels of polymorphism across the genome. Comeron  
138 (75) calculated the observed amount of background selection across the genome in 1000  
139 base pair (bp) windows in the Rwanda population. He then correlated silent polymor-  
140 phism against this measure. Regions with positive residuals (more silent polymorphism  
141 than expected based on background selection) were deemed to be under balancing selec-  
142 tion, while those with negative residuals (less silent polymorphism than expected  
143 based on background selection) were deemed to be under directional selection. Two  
144 regions that contain AMPs (IM4 and Cecropin) were among the handful of outliers  
145 discussed by Comeron as being under balancing selection. We identified all AMP-  
146 containing windows and replotted Comeron's data. This revealed that AMPs tend  
147 to fall in regions well above the trend-line (red points, Figure 2A), indicating they  
148 are evolving in a manner consistent with balancing selection. To further ascertain  
149 whether AMPs as a group show signatures of balancing selection, we used Comeron's

2.3 Accounting for background selection strengthens the signature of balancing selection on *Drosophila* AMPs 2 RESULTS

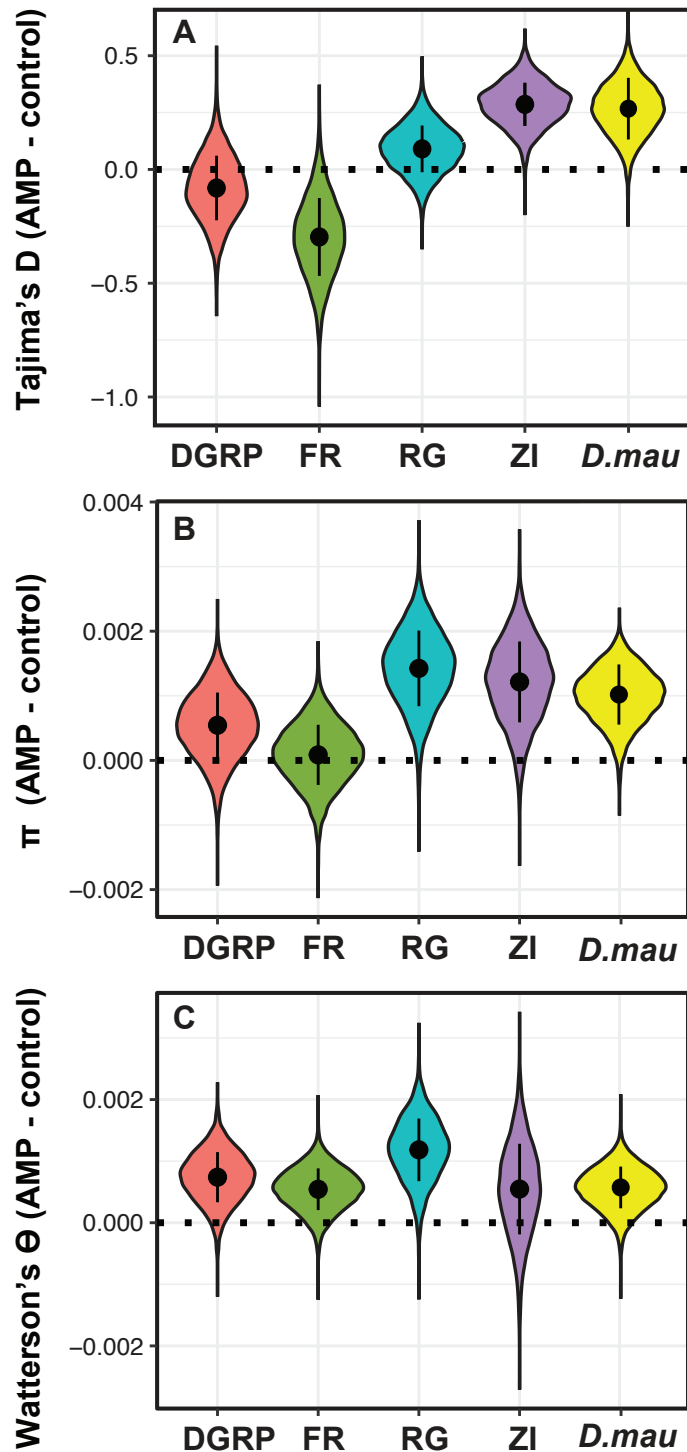

Figure 1: Difference in means between 35 AMPs and randomly chosen control genes, resampled 10000 times, separated by population (DGRP = *Drosophila* Genetics Reference Panel from North Carolina, USA; FR = France; RG = Rwanda; ZI = Zambia). A) Tajima's D, B)  $\pi$ , C) Watterson's  $\theta$ . The black dot within each plot shows the median for that population, and the black bar around the dot visualizes the interquartile range of the distribution.

2.3 Accounting for background selection strengthens the signature of balancing selection on *Drosophila* AMPs 2 RESULTS

| AMP - control statistics                   | DGRP   | FR     | RG     | ZI     | <i>D. mauritiana</i> |
|--------------------------------------------|--------|--------|--------|--------|----------------------|
| Tajima's D differences > 0 (%)             | 28.7   | 4.1    | 81.4   | 99.7   | 98.1                 |
| Tajima's D differences mean                | -0.084 | -0.295 | 0.092  | 0.289  | 0.26                 |
| Tajima's D differences std. dev.           | 0.142  | 0.171  | 0.102  | 0.092  | 0.12                 |
| $\pi$ differences > 0 (%)                  | 85.9   | 58.4   | 98.9   | 96.9   | 100                  |
| $\pi$ differences mean                     | 9.6e-5 | 9.6e-5 | 1.4e-3 | 1.2e-3 | 1.2e-5               |
| $\pi$ differences std. dev.                | 5.5e-4 | 4.8e-5 | 5.5e-3 | 6.1e-4 | 2.1e-6               |
| Watterson's $\theta$ differences > 0 (%)   | 96.2   | 93.7   | 98.5   | 77.4   | 99.9                 |
| Watterson's $\theta$ differences mean      | 7.5e-4 | 5.5e-4 | 1.2e-3 | 5.6e-4 | 1.7e-5               |
| Watterson's $\theta$ differences std. dev. | 4.1e-4 | 3.4e-4 | 5.1e-4 | 7.4e-4 | 1.5e-6               |

Table 1: AMP minus control gene differences for three statistical measures of selection in four *D. melanogaster* populations and one *D. mauritiana* population. First row per statistic: percentage (%) of 10000 replicates in which the AMP minus control difference was positive (>0), suggestive of balancing selection; second row: mean AMP minus control difference across 10000 replicates; third row: standard deviation (std. dev.) of the mean (DGRP = *Drosophila* Genetics Reference Panel from North Carolina, USA; FR = France; RG = Rwanda; ZI = Zambia).

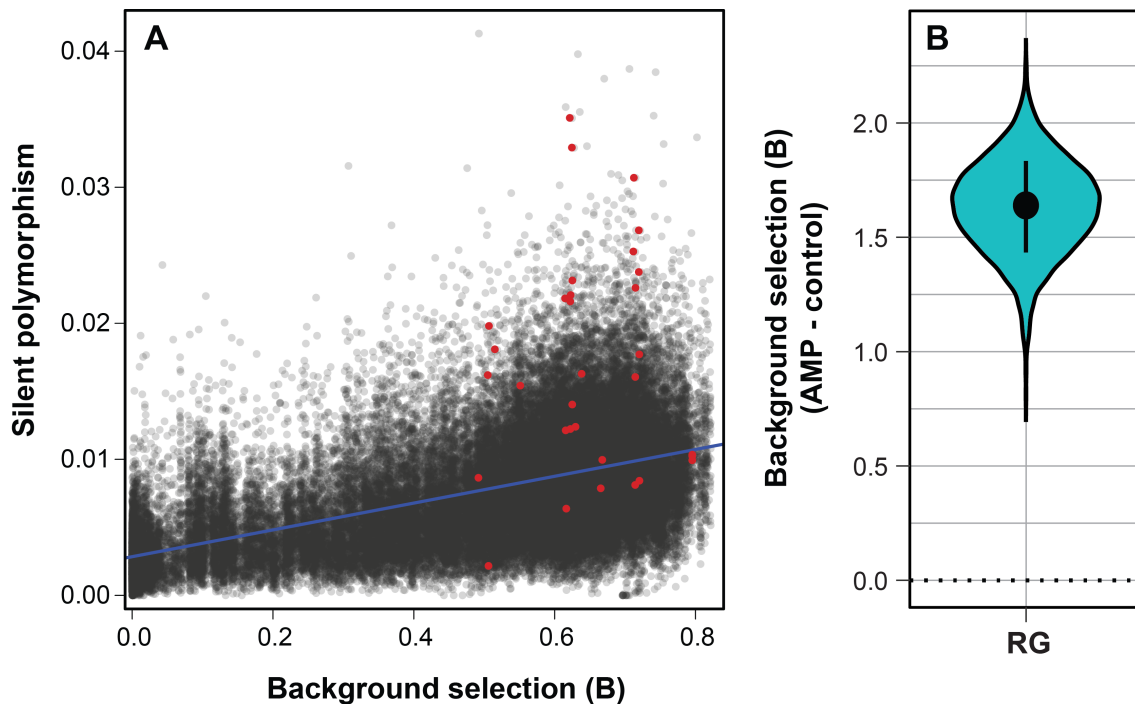

Figure 2: Accounting for background selection strengthens the signal of balancing selection on AMPs. A) Correlation between silent polymorphism and background selection (B) in 1000bp windows for the Rwanda population of *D. melanogaster*. The line of best fit is in blue and regions containing AMPs are indicated by red dots, B) Resampling of mean difference in the background selection statistic between AMPs and control genes.

150 background selection data (75) to calculate residuals for regions containing AMPs and  
151 compared them to residuals for randomly chosen position- and size-controlled genes  
152 employing methods similar to those used in the previous analyses. The distribution  
153 of differences in residuals was always above zero (Figure 2B, mean = 1.63, std. dev.  
154 = 0.20). This supports Comeron's assertion that accounting for background selec-  
155 tion improves the ability to detect balancing selection, and also supports our previous  
156 results showing that AMPs as a group are subject to balancing selection.

## 157 2.4 Balancing selection also acts on *Drosophila mauritiana* AMPs

158 We also calculated population genetic statistics for 9980 genes in 107 *D. mauritiana*  
159 isofemale lines, sequenced as a pool. *D. mauritiana* is an island endemic which di-  
160 verged from *D. melanogaster* approximately 3-5 million years ago (76, 77). SNP fre-  
161 quencies were called using Popoolation which accounts for low frequency variants and  
162 variation in coverage that may influence results from pooled samples (78). As found  
163 for *D. melanogaster*, there was a significant excess of AMPs with a positive Tajima's  
164 D compared to all other genes ( $\chi^2 = 19.96$ ,  $p$ -value < 0.0001), and AMPs have a  
165 higher mean Tajima's D (-1.034 versus -1.463). We again resampled the difference in



166 these statistics between AMPs and neighboring control genes. We found AMPs have  
167 consistently higher values for  $\pi$ , Watterson's  $\theta$  and Tajima's D than their matched  
168 controls (Figure 1, Table 1, Supplementary Tables 2 and 3, Supplementary Figure 4).  
169 For other immunity genes, the differences from controls are primarily negative for  $\pi$ ,  
170 Watterson's  $\theta$  and Tajima's D, suggesting directional selection may be acting on these  
171 genes (Supplementary Table 4, Supplementary Figure 4) in *D. mauritiana*.

### 172 3 Discussion

173 We find evidence consistent with balancing selection being an important evolution-  
174 ary driver of AMP genes in *Drosophila*. This is most clearly observed in ancestral  
175 African populations (Zambia and Rwanda). There are several reasons why previous  
176 analyses may not have conclusively identified the selective forces acting on AMPs.  
177 First, signals of selection can be clouded by background selection. We found that  
178 the clearest signal for AMP balancing selection was in the Rwandan population after  
179 using Comeron's method (75) to account for background selection. Second, previous  
180 studies have tended to group immune genes as a single entity when scanning genomes  
181 for footprints of selection. Strong directional selection acting on some receptor and  
182 signaling immune genes may swamp a subtler signal of balancing selection acting on  
183 antimicrobial peptides. Third, this effect may be exacerbated by the fact that effector  
184 genes tend to be smaller (42) than receptor and signaling genes. Fourth, patterns  
185 of nucleotide polymorphism are strongly influenced by population demographic his-  
186 tory. Our case-control approach should account for the confounding influences of local  
187 mutation and recombination rate variation, gene size and demography (79).

188 As populations establish in new habitats the pathogen pressure will be different,  
189 as will prevailing environmental conditions. This could dramatically alter which alle-  
190 les are selectively advantageous. Loss of disadvantageous alleles (for example alleles  
191 resistant to pathogens not present in the new habitat) likely occurs more rapidly  
192 than establishment of new, beneficial polymorphisms (for example resistance alleles  
193 for newly encountered pathogens). This may explain why we find the strongest ev-  
194 idence for balancing selection on AMPs in ancestral African populations that have  
195 been co-evolving with their pathogens, under semi-predictable conditions, for long  
196 time-periods.

197 It is tempting to look to newly developed methods for detecting balancing selection  
198 (80, 81), but these statistics were developed for detecting the molecular footprints  
199 of selection in human populations. Assumptions about the genomic signatures of a  
200 balanced polymorphism that work well in humans are not applicable to *Drosophila*,  
201 because the window of linked polymorphism likely to show these signatures is tiny.  
202 To state this numerically, DeGiorgio *et al.* (81), based on Gao *et al.* (82), suggest

203 a window size of  $1/\rho$  (where  $\rho$  is the population-scaled recombination rate or  $4N_e r$ )  
204 for observing the signature of a linked balanced polymorphism. For humans,  $\rho$  is  
205 about 0.001 so the window size is about 1000 bp (81). Estimates of  $\rho$  in *Drosophila*  
206 are highest in the DGRP population and range from 9.6 to 14.8 for the different  
207 chromosomes (83). These values correspond to windows of less than 1/10 of a single  
208 base in *Drosophila*, rendering these tests unusable in this genus.

209 We find that, at least in ancestral populations, AMPs tend to evolve in a man-  
210 ner consistent with balancing selection. This is in contrast to other immune genes  
211 that show no such pattern. Why are AMPs different than other immune genes? One  
212 characteristic of AMPs is that they interact directly with microbes (84), and, in some  
213 cases, AMP sequence is directly linked to the efficacy of bacterial membrane inter-  
214 actions (85). If particular AMP alleles encode for peptides that are more effective  
215 at fighting infection by particular microbes, a fluctuating suite of pathogens in the  
216 environment over time or space could lead to balanced polymorphisms. This "speci-  
217 ficity hypothesis" suggests that allele frequencies in AMPs should vary spatially or  
218 temporally. There is some evidence for both seasonal (66) and spatial (67) variation  
219 in selection pressure on AMPs. However, evidence for AMP specificity against par-  
220 ticular pathogens, especially different naturally occurring alleles of the same AMP, is  
221 currently rare (but see e.g. (63, 86, 87, 88)).

222 Alternatively, AMP variation might be maintained because AMP alleles that are  
223 more effective against pathogens also carry a higher autoimmune cost. This "autoim-  
224 mune hypothesis" states that more effective AMP alleles should be common during  
225 pathogen epidemics, but decrease in frequency when pathogens are rare. These pat-  
226 terns might also vary spatially and temporally, making the interpretation of these  
227 context-dependent patterns more difficult. There is evidence that overexpression of  
228 AMPs can have deleterious fitness consequences (89, 90, 91). However, it seems that  
229 if autoimmune costs were important in maintaining variation, we would also see signa-  
230 tures of balancing selection in the IMD and toll pathway signaling genes that control  
231 expression of AMPs. Most work suggests that these genes are evolving under the arms  
232 race model (57, 58, 59). Distinguishing between these two hypotheses for the adaptive  
233 maintenance of AMP genetic variation will take careful functional analysis.

## 234 4 Methods

### 235 4.1 Polymorphism in four populations of *Drosophila melanogaster*

236 We downloaded chromosome sequences for the Zambia (ZI, n=197), Rwanda (RG,  
237 n=27), *Drosophila melanogaster* Genetic Reference Panel (DGRP, n=205) and France  
238 (FR, n=96) populations, available as part of the *Drosophila Genome Nexus*, from  
239 <http://www.johnpool.net/genomes.html> (92, 93). We then converted these sequences

240 into FASTA files, per chromosome, for each population. We also created a second set of  
241 FASTA files that excluded chromosomes known to contain the *Segregation Distorter*  
242 (*SD*) haplotype (taken from: (74)). The RG and ZI populations are much higher  
243 quality data, the average per base coverage of the raw FASTQ data used to generate  
244 the FASTA files is much higher, and the number of ambiguous bases is much lower  
245 than the DGRP and FR populations (Supplementary Table 1).

246 Using annotation 5.57 of the *D. melanogaster* genome, we extracted the FASTA  
247 alignments for each gene. Following this, we used a custom bioperl script, with the  
248 the package Bio, to find  $\pi$ , Watterson's  $\theta$ , Tajima's D and the number of segregating  
249 sites for each gene. We categorized each gene using the designations found in Obbard  
250 *et al.* (57). We removed non-autosomal genes from all downstream analyses, because  
251 the X chromosome does not harbor any AMPs.

252 For each analysis, (per population, including and excluding SD chromosomes) we  
253 then resampled to find the average difference in scores between case and control genes.  
254 Case genes were either a) AMPS, or b) immunity genes (using gene ontologies pre-  
255 viously described (58)). For each gene in these categories, we randomly sampled a  
256 control gene within 100kbp upstream or downstream, that was no more than ten  
257 times larger than this gene and not another gene in the given category (AMP or  
258 immunity). We then found the average difference ( $\bar{\Delta}$ ) in each measure for the case  
259 (AMP/immunity) group and the control group such that:

$$\bar{\Delta} = \frac{1}{n} \sum_{i=1}^n X_{Case} - X_{Control}$$

260 where  $X_{Case}$  represents the chosen gene,  $X_{Control}$  represents the randomly sampled  
261 control gene and  $n$  accounts for the number of genes in the group. We then repeated  
262 this 10000 times to obtain an empirical distribution of the differences.

263 We employ this method to control for genomewide variation in recombination  
264 rates, mutation rates, and possibly, demographic history. Resampling 10000 times  
265 allows for a robust empirical distribution that does not rely on the particular control  
266 genes chosen. We therefore present the distribution of differences as violin plots and  
267 purposefully do not discuss significance in terms of  $P$ -values. Instead, the proportion  
268 of resamplings that do not overlap zero is more analogous to a bootstrap value.

## 269 4.2 Polymorphism in a population of *Drosophila mauritiana*

270 We downloaded the reference genome, annotation and mapped BAM file of a popula-  
271 tion of *D. mauritiana* from [http://www.popoolation.at/mauritiana\\_genome/](http://www.popoolation.at/mauritiana_genome/), and  
272 used Popoolation to calculate Tajima's D,  $\pi$  and Watterson's  $\theta$  for each gene in this  
273 population. We then resampled to find the average difference in scores between AMPs  
274 and a control set of genes, as described above.

## 5 Supplementary Material

**Supplementary Table 1** - Summary statistics for each dataset, including the average base coverage for each population and the average number of ambiguous bases per 1000 bases in the FASTA files used. Data taken from [johnpool.net/genomes.html](http://johnpool.net/genomes.html).

**Supplementary Table 2** - Summary statistics for each AMP and immunity gene for each population, also the mean for each statistic for all non-AMP immune genes.

**Supplementary Table 3** -  $\chi^2$  test contingency tables for each population, showing the number of AMPs and other genes with positive and negative Tajima's D.

**Supplementary Table 4** - Summary of resampling results across case (AMPs/immunity) genes and their matched control genes. These statistics include the percentage greater than 0, mean and standard deviation for each resampling set.

**Supplementary Table 5** - Summary of resampling results across case (AMPs/immunity) genes and their matched control genes, with all SD containing samples removed. These statistics include the percentage greater than 0, mean and standard deviation for each resampling set.

**Supplementary Figure 1** - Summary of resampling results (case - control) for AMPs and other immunity genes for Tajima's D,  $\pi$ , Watterson's  $\theta$ .

**Supplementary Figure 2** - Summary of resampling results (case - control) for AMPs for Tajima's D,  $\pi$ , Watterson's  $\theta$ , using the subset of non-linked AMPs.

**Supplementary Figure 3** - Summary of resampling results (case - control) for AMPs and other immunity genes for Tajima's D,  $\pi$ , Watterson's  $\theta$ , comparing the results of ZI and FR populations with and without SD chromosomes.

**Supplementary Figure 4** - Summary of resampling results (case - control) for AMPs and other immunity genes for Tajima's D,  $\pi$ , Watterson's  $\theta$  in the *D. mauritiana* population.

## 6 Acknowledgments

We would like to thank John Kelly and Jamie Walters for thoughtful feedback on a previous version of the manuscript. Josep Comeron graciously provided additional data files from his background selection paper. Michael Degiorgio and Katie Sewart provided guidance on using their software packages for *Drosophila* populations. This work was supported by the National Institutes of Health (P20 GM103420 and R00 GM114714 to RLU) and the Max Kade Foundation (fellowship to TH). The funders had no role in study design, data collection and interpretation, or the decision to submit the work for publication.

309

## References

310

1. S. Paterson, T. Vogwill, A. Buckling, R. Benmayor, A. J. Spiers, N. R. Thomson, M. Quail, F. Smith, D. Walker, B. Libberton, A. Fenton, N. Hall, and M. A. Brockhurst, "Antagonistic coevolution accelerates molecular evolution," *Nature*, vol. 464, no. 7286, pp. 275–278, 2010.

314

2. R. D. Schulte, C. Makus, B. Hasert, N. K. Michiels, and H. Schulenburg, "Multiple reciprocal adaptations and rapid genetic change upon experimental coevolution of an animal host and its microbial parasite," *Proceedings of the National Academy of Sciences of the United States of America*, vol. 107, no. 16, pp. 7359–7364, 2010.

318

3. P. H. Thrall, A.-L. Laine, M. Ravensdale, A. Nemri, P. N. Dodds, L. G. Barrett, and J. J. Burdon, "Rapid genetic change underpins antagonistic coevolution in a natural host-pathogen metapopulation," *Ecology Letters*, vol. 15, no. 5, pp. 425–435, 2012.

322

4. T. Downing, P. Cormican, C. O'Farrelly, D. G. Bradley, and A. T. Lloyd, "Evidence of the adaptive evolution of immune genes in chicken," *BMC Research Notes*, vol. 2, p. 254, 2009.

325

5. C. Kosiol, T. Vinař, R. R. da Fonseca, M. J. Hubisz, C. D. Bustamante, R. Nielsen, and A. Siepel, "Patterns of positive selection in six mammalian genomes," *PLoS Genetics*, vol. 4, no. 8, p. e1000144, 2008.

328

6. S. J. McTaggart, D. J. Obbard, C. Conlon, and T. J. Little, "Immune genes undergo more adaptive evolution than non-immune system genes in *Daphnia pulex*," *BMC Evolutionary Biology*, vol. 12, no. 63, 2012.

331

7. R. Nielsen, C. Bustamante, A. G. Clark, S. Glanowski, T. B. Sackton, M. J. Hubisz, A. Fledel-Alon, D. M. Tanenbaum, D. Civello, T. J. White, J. J. Sninsky, M. D. Adams, and M. Cargill, "A scan for positively selected genes in the genomes of humans and chimpanzees," *PLoS Biology*, vol. 3, no. 6, p. e170, 2005.

335

8. R. Ekblom, L. French, J. Slate, and T. Burke, "Evolutionary analysis and expression profiling of zebra finch immune genes," *Genome Biology and Evolution*, vol. 2, pp. 781–790, 2010.

338

9. E. A. Stahl, G. Dwyer, R. Mauricio, M. Kreitman, and J. Bergelson, "Dynamics of disease resistance polymorphism at the *Rpm1* locus of *Arabidopsis*," *Nature*, vol. 400, no. 6745, pp. 667–671, 1999.

341

10. V. Llaurens, A. Whibley, and M. Joron, "Genetic architecture and balancing selection: the life and death of differentiated variants," *Molecular Ecology*, vol. 26, no. 9, pp. 2430–2448, 2017.

343

REFERENCES

REFERENCES

- 344 11. D. Charlesworth, “Balancing selection and its effects on sequences in nearby  
345 genome regions,” *PLoS Genetics*, vol. 2, no. 4, p. e64, 2006.
- 346 12. L. Lambrechts, S. Fellous, and J. C. Koella, “Coevolutionary interactions between  
347 host and parasite genotypes,” *Trends in Parasitology*, vol. 22, no. 1, pp. 12–16,  
348 2006.
- 349 13. R. L. Unckless and B. P. Lazzaro, “The potential for adaptive maintenance of  
350 diversity in insect antimicrobial peptides,” *Philosophical Transactions of the Royal  
351 Society of London. Series B, Biological Sciences*, vol. 371, no. 1695, p. 20150291,  
352 2016.
- 353 14. S. Gandon and Y. Michalakis, “Local adaptation, evolutionary potential and host-  
354 parasite coevolution: interactions between migration, mutation, population size  
355 and generation time,” *Journal of Evolutionary Biology*, vol. 15, no. 3, pp. 451–462,  
356 2002.
- 357 15. J. Wolinska and K. C. King, “Environment can alter selection in host-parasite  
358 interactions,” *Trends in Parasitology*, vol. 25, no. 5, pp. 236–244, 2009.
- 359 16. M. A. Brockhurst, A. D. Morgan, P. B. Rainey, and A. Buckling, “Population  
360 mixing accelerates coevolution,” *Ecology Letters*, vol. 6, no. 11, pp. 975–979, 2003.
- 361 17. L. Bernatchez and C. Landry, “MHC studies in nonmodel vertebrates: what have  
362 we learned about natural selection in 15 years?,” *Journal of Evolutionary Biology*,  
363 vol. 16, no. 3, pp. 363–377, 2003.
- 364 18. P. W. Hedrick, “Balancing selection and MHC,” *Genetica*, vol. 104, no. 3, pp. 207–  
365 214, 1998.
- 366 19. S. V. Edwards and P. W. Hedrick, “Evolution and ecology of MHC molecules:  
367 from genomics to sexual selection,” *Trends in Ecology and Evolution*, vol. 13,  
368 no. 8, pp. 305–311, 1998.
- 369 20. A. L. Hughes and M. Yeager, “Natural selection at major histocompatibility com-  
370 plex loci of vertebrates,” *Annual Review of Genetics*, vol. 32, no. 1, pp. 415–435,  
371 1998.
- 372 21. A. Ferrer-Admetlla, E. Bosch, M. Sikora, T. Marquès-Bonet, A. Ramírez-Soriano,  
373 A. Muntasell, A. Navarro, R. Lazarus, F. Calafell, J. Bertranpetit, and F. Casals,  
374 “Balancing selection is the main force shaping the evolution of innate immunity  
375 genes,” *Journal of Immunology*, vol. 181, no. 2, pp. 1315–1322, 2008.
- 376 22. E. Quéméré, M. Galan, J. F. Cosson, F. Klein, S. Aulagnier, E. Gilot-Fromont,  
377 J. Merlet, M. Bonhomme, A. J. M. Hewison, and N. Charbonnel, “Immunogenetic

REFERENCES

REFERENCES

- 378 heterogeneity in a widespread ungulate: the European roe deer (*Capreolus capre-*  
379 *olus*),” *Molecular Ecology*, vol. 24, no. 15, pp. 3873–3887, 2015.
- 380 23. M. Alcaide and S. V. Edwards, “Molecular evolution of the Toll-like receptor multi-  
381 gene family in birds,” *Molecular Biology and Evolution*, vol. 28, no. 5, pp. 1703–  
382 1715, 2011.
- 383 24. D. L. Gilroy, K. P. Phillips, D. S. Richardson, and C. van Oosterhout, “Toll-  
384 like receptor variation in the bottlenecked population of the Seychelles warbler:  
385 computer simulations see the ‘ghost of selection past’ and quantify the ‘drift debt’,”  
386 *Journal of Evolutionary Biology*, vol. 30, no. 7, pp. 1276–1287, 2017.
- 387 25. M. Fumagalli, U. Pozzoli, R. Cagliani, G. P. Comi, S. Riva, M. Clerici, N. Bresolin,  
388 and M. Sironi, “Parasites represent a major selective force for interleukin genes  
389 and shape the genetic predisposition to autoimmune conditions,” *Journal of Ex-*  
390 *perimental Medicine*, vol. 206, no. 6, pp. 1395–1408, 2009.
- 391 26. A. L. Hughes, B. Packer, R. Welch, S. J. Chanock, and M. Yeager, “High level  
392 of functional polymorphism indicates a unique role of natural selection at human  
393 immune system loci,” *Immunogenetics*, vol. 57, no. 11, pp. 821–827, 2005.
- 394 27. J. N. Wilson, K. Rockett, B. Keating, M. Jallow, M. Pinder, F. Sisay-Joof,  
395 M. Newport, and D. Kwiatkowski, “A hallmark of balancing selection is present  
396 at the promoter region of interleukin 10,” *Genes and Immunity*, vol. 7, no. 8,  
397 pp. 680–683, 2006.
- 398 28. T. Downing, A. T. Lloyd, C. O’Farrelly, and D. G. Bradley, “The differential  
399 evolutionary dynamics of avian cytokine and TLR gene classes,” *Journal of Im-*  
400 *munology*, vol. 184, no. 12, pp. 6993–7000, 2010.
- 401 29. T. Downing, D. J. Lynn, S. Connell, A. T. Lloyd, A. K. Bhuiyan, P. Silva, A. N.  
402 Naqvi, R. Sanfo, R.-S. Sow, B. Podisi, O. Hanotte, C. O’Farrelly, and D. G.  
403 Bradley, “Evidence of balanced diversity at the chicken interleukin 4 receptor  
404 alpha chain locus,” *BMC Evolutionary Biology*, vol. 9, p. 136, 2009.
- 405 30. T. Downing, D. J. Lynn, S. Connell, A. T. Lloyd, A. K. F. H. Bhuiyan, P. Silva,  
406 A. N. Naqvi, R. Sanfo, R.-S. Sow, B. Podisi, C. O’Farrelly, O. Hanotte, and  
407 D. G. Bradley, “Contrasting evolution of diversity at two disease-associated chicken  
408 genes,” *Immunogenetics*, vol. 61, no. 4, pp. 303–314, 2009.
- 409 31. A. K. Turner, M. Begon, J. A. Jackson, and S. Paterson, “Evidence for selection at  
410 cytokine loci in a natural population of field voles (*Microtus agrestis*),” *Molecular*  
411 *Ecology*, vol. 21, no. 7, pp. 1632–1646, 2012.

REFERENCES

REFERENCES

- 412 32. W. Ferguson, S. Dvora, J. Gallo, A. Orth, and S. Boissinot, “Long-term balancing  
413 selection at the West Nile virus resistance gene, *Oas1b*, maintains transspecific  
414 polymorphisms in the house mouse,” *Molecular Biology and Evolution*, vol. 25,  
415 no. 8, pp. 1609–1618, 2008.
- 416 33. W. Ferguson, S. Dvora, R. W. Fikes, A. C. Stone, and S. Boissinot, “Long-term  
417 balancing selection at the antiviral gene *OAS1* in Central African chimpanzees,”  
418 *Molecular Biology and Evolution*, vol. 29, no. 4, pp. 1093–1103, 2012.
- 419 34. I. Fish and S. Boissinot, “Contrasted patterns of variation and evolutionary con-  
420 vergence at the antiviral *OAS1* gene in old world primates,” *Immunogenetics*,  
421 vol. 67, no. 9, pp. 487–499, 2015.
- 422 35. R. Cagliani, M. Fumagalli, M. Biasin, L. Piacentini, S. Riva, U. Pozzoli, M. C.  
423 Bonaglia, N. Bresolin, M. Clerici, and M. Sironi, “Long-term balancing selection  
424 maintains *trans*-specific polymorphisms in the human *TRIM5* gene,” *Human Ge-*  
425 *netics*, vol. 128, no. 6, pp. 577–588, 2010.
- 426 36. R. M. Newman, L. Hall, M. Connole, G.-L. Chen, S. Sato, E. Yuste, W. Diehl,  
427 E. Hunter, A. Kaur, G. M. Miller, and W. E. Johnson, “Balancing selection and  
428 the evolution of functional polymorphism in Old World monkey *TRIM5 $\alpha$* ,” *Pro-*  
429 *ceedings of the National Academy of Sciences of the United States of America*,  
430 vol. 103, no. 50, pp. 19134–19139, 2006.
- 431 37. B. Lemaitre, E. Nicolas, L. Michaut, J.-M. Reichhart, and J. A. Hoffmann, “The  
432 dorsoventral regulatory gene cassette *spätzle/Toll/cactus* controls the potent an-  
433 tifungal response in *Drosophila* adults,” *Cell*, vol. 86, no. 6, pp. 973–983, 1996.
- 434 38. P. Tzou, S. Ohresser, D. Ferrandon, M. Capovilla, J.-M. Reichhart, B. Lemaitre,  
435 J. A. Hoffmann, and J.-L. Imler, “Tissue-specific inducible expression of antimicro-  
436 bial peptide genes in *Drosophila* surface epithelia,” *Immunity*, vol. 13, no. 5,  
437 pp. 737–748, 2000.
- 438 39. K. A. Brogden, “Antimicrobial peptides: pore formers or metabolic inhibitors in  
439 bacteria?,” *Nature Reviews Microbiology*, vol. 3, no. 3, pp. 238–250, 2005.
- 440 40. Y. Shai, “Mode of action of membrane active antimicrobial peptides,” *Peptide*  
441 *Science*, vol. 66, no. 4, pp. 236–248, 2002.
- 442 41. E. De Gregorio, P. T. Spellman, P. Tzou, G. M. Rubin, and B. Lemaitre, “The Toll  
443 and Imd pathways are the major regulators of the immune response in *Drosophila*,”  
444 *The EMBO Journal*, vol. 21, no. 11, pp. 2568–2579, 2002.
- 445 42. B. Lemaitre and J. Hoffmann, “The host defense of *Drosophila melanogaster*,”  
446 *Annual Review of Immunology*, vol. 25, pp. 697–743, 2007.



REFERENCES

REFERENCES

- 447 43. J. R. Chapman, O. Hellgren, A. S. Helin, R. H. S. Kraus, R. L. Cromie, and  
448 J. Waldenström, “The evolution of innate immune genes: purifying and balancing  
449 selection on  $\beta$ -defensins in waterfowl,” *Molecular Biology and Evolution*, vol. 33,  
450 no. 12, pp. 3075–3087, 2016.
- 451 44. O. Hellgren and B. C. Sheldon, “Locus-specific protocol for nine different innate  
452 immune genes (antimicrobial peptides:  $\beta$ -defensins) across passerine bird species  
453 reveals within-species coding variation and a case of trans-species polymorphisms,”  
454 *Molecular Ecology Resources*, vol. 11, no. 4, pp. 686–692, 2011.
- 455 45. J. A. Tennessen and M. S. Blouin, “Balancing selection at a frog antimicrobial pep-  
456 tide locus: fluctuating immune effector alleles?,” *Molecular Biology and Evolution*,  
457 vol. 25, no. 12, pp. 2669–2680, 2008.
- 458 46. K. Halldórsdóttir and E. Árnason, “Trans-species polymorphism at antimicrobial  
459 innate immunity cathelicidin genes of Atlantic cod and related species,” *PeerJ*,  
460 vol. 3, p. e976, 2015.
- 461 47. C. C. Gosset, J. Do Nascimento, M.-T. Augé, and N. Bierne, “Evidence for adap-  
462 tation from standing genetic variation on an antimicrobial peptide gene in the  
463 mussel *Mytilus edulis*,” *Molecular Ecology*, vol. 23, no. 12, pp. 3000–3012, 2014.
- 464 48. E. J. Hollox and J. A. L. Armour, “Directional and balancing selection in human  
465 beta-defensins,” *BMC Evolutionary Biology*, vol. 8, p. 113, 2008.
- 466 49. R. Cagliani, M. Fumagalli, S. Riva, U. Pozzoli, G. P. Comi, G. Menozzi,  
467 N. Bresolin, and M. Sironi, “The signature of long-standing balancing selection  
468 at the human defensin  $\beta$ -1 promoter,” *Genome Biology*, vol. 9, no. 9, p. R143,  
469 2008.
- 470 50. S. Janssens and R. Beyaert, “Role of toll-like receptors in pathogen recognition,”  
471 *Clinical Microbiology Reviews*, vol. 16, no. 4, pp. 637–646, 2003.
- 472 51. J. A. Hoffmann, “The immune response of *Drosophila*,” *Nature*, vol. 426, no. 6962,  
473 pp. 33–38, 2003.
- 474 52. O. Lamiable, C. Kellenberger, C. Kemp, L. Troxler, N. Pelte, M. Boutros, J. T.  
475 Marques, L. Daeffler, J. A. Hoffmann, A. Roussel, and J.-L. Imler, “Cytokine  
476 Diedel and a viral homologue suppress the IMD pathway in *Drosophila*,” *Proceed-  
477 ings of the National Academy of Sciences*, vol. 113, no. 3, pp. 698–703, 2016.
- 478 53. C. Dostert, E. Jouanguy, P. Irving, L. Troxler, D. Galiana-Arnoux, C. Hetru, J. A.  
479 Hoffmann, and J.-L. Imler, “The Jak-STAT signaling pathway is required but not  
480 sufficient for the antiviral response of *Drosophila*,” *Nature Immunology*, vol. 6,  
481 no. 9, pp. 946–953, 2005.

REFERENCES

REFERENCES

- 482 54. D. Hultmark, “Immune reactions in *Drosophila* and other insects: a model for  
483 innate immunity,” *Trends in Genetics*, vol. 9, no. 5, pp. 178–183, 1993.
- 484 55. A. G. Clark, M. B. Eisen, D. R. Smith, C. M. Bergman, B. Oliver, T. A. Markow,  
485 T. C. Kaufman, *et al.*, “Evolution of genes and genomes on the *Drosophila* phy-  
486 logeny,” *Nature*, vol. 450, no. 7167, pp. 203–218, 2007.
- 487 56. A. Heger and C. P. Ponting, “Evolutionary rate analyses of orthologs and paralogs  
488 from 12 *Drosophila* genomes,” *Genome Research*, vol. 17, no. 12, pp. 1837–1849,  
489 2007.
- 490 57. D. J. Obbard, F. M. Jiggins, D. L. Halligan, and T. J. Little, “Natural selec-  
491 tion drives extremely rapid evolution in antiviral RNAi genes,” *Current Biology*,  
492 vol. 16, no. 6, pp. 580–585, 2006.
- 493 58. D. J. Obbard, J. J. Welch, K.-W. Kim, and F. M. Jiggins, “Quantifying adap-  
494 tive evolution in the *Drosophila* immune system,” *PLoS Genetics*, vol. 5, no. 10,  
495 p. e1000698, 2009.
- 496 59. T. B. Sackton, B. P. Lazzaro, T. A. Schlenke, J. D. Evans, D. Hultmark, and  
497 A. G. Clark, “Dynamic evolution of the innate immune system in *Drosophila*,”  
498 *Nature Genetics*, vol. 39, no. 12, pp. 1461–1468, 2007.
- 499 60. T. A. Schlenke and D. J. Begun, “Natural selection drives *Drosophila* immune  
500 system evolution,” *Genetics*, vol. 164, no. 4, pp. 1471–1480, 2003.
- 501 61. M. Croze, A. Wollstein, V. Božičević, D. Živković, W. Stephan, and S. Hutter, “A  
502 genome-wide scan for genes under balancing selection in *Drosophila melanogaster*,”  
503 *BMC Evolutionary Biology*, vol. 17, p. 15, 2017.
- 504 62. M. Croze, D. Živković, W. Stephan, and S. Hutter, “Balancing selection on im-  
505 munity genes: review of the current literature and new analysis in *Drosophila*  
506 *melanogaster*,” *Zoology*, vol. 119, no. 4, pp. 322–329, 2016.
- 507 63. R. L. Unckless, V. M. Howick, and B. P. Lazzaro, “Convergent balancing selec-  
508 tion on an antimicrobial peptide in *Drosophila*,” *Current Biology*, vol. 26, no. 2,  
509 pp. 257–262, 2016.
- 510 64. M. A. Hanson, P. T. Hamilton, and S. J. Perlman, “Immune genes and divergent  
511 antimicrobial peptides in flies of the subgenus *Drosophila*,” *BMC Evolutionary*  
512 *Biology*, vol. 16, p. 228, 2016.
- 513 65. A. O. Bergland, E. L. Behrman, K. R. O’Brien, P. S. Schmidt, and D. A. Petrov,  
514 “Genomic evidence of rapid and stable adaptive oscillations over seasonal time  
515 scales in *Drosophila*,” *PLoS Genetics*, vol. 10, no. 11, p. e1004775, 2014.

REFERENCES

REFERENCES

- 516 66. E. L. Behrman, V. M. Howick, M. Kapun, F. Staubach, A. O. Bergland, D. A.  
517 Petrov, B. P. Lazzaro, and P. S. Schmidt, “Rapid seasonal evolution in innate  
518 immunity of wild *Drosophila melanogaster*,” *Proceedings of the Royal Society of*  
519 *London. Series B, Biological Sciences*, vol. 285, no. 1870, p. 20172599, 2018.
- 520 67. A. M. Early, J. R. Arguello, M. Cardoso-Moreira, S. Gottipati, J. K. Grenier, and  
521 A. G. Clark, “Survey of global genetic diversity within the *Drosophila* immune  
522 system,” *Genetics*, vol. 205, no. 1, pp. 353–366, 2017.
- 523 68. J. B. Lack, J. D. Lange, A. D. Tang, R. B. Corbett-Detig, and J. E. Pool, “A  
524 thousand fly genomes: an expanded *Drosophila* Genome Nexus,” *Molecular Biol-*  
525 *ogy and Evolution*, vol. 33, no. 12, pp. 3308–3313, 2016.
- 526 69. A. Keller, “*Drosophila melanogaster*’s history as a human commensal,” *Current*  
527 *Biology*, vol. 17, no. 3, pp. R77–R81, 2007.
- 528 70. H. Li and W. Stephan, “Inferring the demographic history and rate of adaptive  
529 substitution in *Drosophila*,” *PLoS Genetics*, vol. 2, no. 10, p. e166, 2006.
- 530 71. J. R. David and P. Cappy, “Genetic variation of *Drosophila melanogaster* natural  
531 populations,” *Trends in Genetics*, vol. 4, no. 4, pp. 106–111, 1988.
- 532 72. S. Glinka, L. Ometto, S. Mousset, W. Stephan, and D. De Lorenzo, “Demography  
533 and natural selection have shaped genetic variation in *Drosophila melanogaster*:  
534 a multi-locus approach,” *Genetics*, vol. 165, no. 3, pp. 1269–1278, 2003.
- 535 73. J. A. Shapiro, W. Huang, C. H. Zhang, M. J. Hubisz, J. Lu, D. A. Turissini,  
536 S. Fang, H.-Y. Wang, R. R. Hudson, R. Nielsen, Z. Chen, and C.-I. Wu, “Adaptive  
537 genic evolution in the *Drosophila* genomes,” *Proceedings of the National Academy*  
538 *of Sciences of the United States of America*, vol. 104, no. 7, pp. 2271–2276, 2007.
- 539 74. C. L. Brand, A. M. Larracuenta, and D. C. Presgraves, “Origin, evolution, and  
540 population genetics of the selfish *Segregation Distorter* gene duplication in Eu-  
541 ropean and African populations of *Drosophila melanogaster*,” *Evolution*, vol. 69,  
542 no. 5, pp. 1271–1283, 2015.
- 543 75. J. M. Comeron, “Background selection as baseline for nucleotide variation across  
544 the *Drosophila* genome,” *PLoS Genetics*, vol. 10, no. 6, p. e1004434, 2014.
- 545 76. D. J. Obbard, J. Maclellan, K.-W. Kim, A. Rambaut, P. M. O’Grady, and F. M.  
546 Jiggins, “Estimating divergence dates and substitution rates in the *Drosophila*  
547 phylogeny,” *Molecular Biology and Evolution*, vol. 29, no. 11, pp. 3459–3473, 2012.
- 548 77. V. Nolte, R. V. Pandey, R. Kofler, and C. Schlötterer, “Genome-wide patterns of  
549 natural variation reveal strong selective sweeps and ongoing genomic conflict in  
550 *Drosophila mauritiana*,” *Genome Research*, vol. 23, no. 1, pp. 99–110, 2013.

REFERENCES

REFERENCES

- 551 78. R. Kofler, P. Orozco-terWengel, N. De Maio, R. V. Pandey, V. Nolte, A. Futschik,  
552 C. Kosiol, and C. Schlötterer, “PoPoolation: a toolbox for population genetic  
553 analysis of next generation sequencing data from pooled individuals,” *PLoS ONE*,  
554 vol. 6, no. 1, p. e15925, 2011.
- 555 79. D. Garrigan and P. W. Hedrick, “Perspective: detecting adaptive molecular poly-  
556 morphism: Lessons from the MHC,” *Evolution*, vol. 57, no. 8, pp. 1707–1722,  
557 2003.
- 558 80. K. M. Siewert and B. F. Voight, “Detecting long-term balancing selection using  
559 allele frequency correlation,” *Molecular Biology and Evolution*, vol. 34, no. 11.
- 560 81. M. DeGiorgio, K. E. Lohmueller, and R. Nielsen, “A model-based approach for  
561 identifying signatures of ancient balancing selection in genetic data,” *PLoS Ge-  
562 netics*, vol. 10, no. 8, p. e1004561, 2014.
- 563 82. Z. Y. Gao, M. Przeworski, and G. Sella, “Footprints of ancient-balanced polymor-  
564 phisms in genetic variation data from closely related species,” *Evolution*, vol. 69,  
565 no. 2, pp. 431–446, 2015.
- 566 83. A. H. Chan, P. A. Jenkins, and Y. S. Song, “Genome-wide fine-scale recombina-  
567 tion rate variation in *Drosophila melanogaster*,” *PLoS Genetics*, vol. 8, no. 12,  
568 p. e1003090, 2012.
- 569 84. P. Bulet and R. Stocklin, “Insect antimicrobial peptides: structures, properties  
570 and gene regulation,” *Protein and Peptide Letters*, vol. 12, no. 1, pp. 3–11, 2005.
- 571 85. P. Schmitt, R. D. Rosa, and D. Destoumieux-Garzón, “An intimate link between  
572 antimicrobial peptide sequence diversity and binding to essential components of  
573 bacterial membranes,” *Biochimica Et Biophysica Acta-Biomembranes*, vol. 1858,  
574 no. 5, pp. 958–970, 2016.
- 575 86. O. Hellgren, B. C. Sheldon, and A. Buckling, “*In vitro* tests of natural allelic  
576 variation of innate immune genes (avian  $\beta$ -defensins) reveal functional differences  
577 in microbial inhibition,” *Journal of Evolutionary Biology*, vol. 23, no. 12, pp. 2726–  
578 2730, 2010.
- 579 87. D. Park, J. W. Jung, M. O. Lee, S. Y. Lee, B. Kim, H. J. Jin, J. Kim, Y.-J. Ahn,  
580 K. W. Lee, Y. S. Song, S. Hong, J. E. Womack, and H. W. Kwon, “Functional  
581 characterization of naturally occurring melittin peptide isoforms in two honey bee  
582 species, *Apis mellifera* and *Apis cerana*,” *Peptides*, vol. 53, pp. 185–193, 2014.
- 583 88. J. A. Tennessen, D. C. Woodhams, P. Chaurand, L. K. Reinert, D. Billheimer,  
584 Y. Shyr, R. M. Caprioli, M. S. Blouin, and L. A. Rollins-Smith, “Variations in

REFERENCES

REFERENCES

- 585 the expressed antimicrobial peptide repertoire of northern leopard frog (*Rana*  
586 *pipiens*) populations suggest intraspecies differences in resistance to pathogens,”  
587 *Developmental and Comparative Immunology*, vol. 33, no. 12, pp. 1247–1257, 2009.
- 588 89. M. Gilliet and R. Lande, “Antimicrobial peptides and self-DNA in autoimmune  
589 skin inflammation,” *Current Opinion in Immunology*, vol. 20, no. 4, pp. 401–407,  
590 2008.
- 591 90. H. Benachour, M. Zaiou, A. Samara, B. Herbeth, M. Pfister, D. Lambert, G. Siest,  
592 and S. Visvikis-Siest, “Association of human cathelicidin (hCAP-18/LL-37) gene  
593 expression with cardiovascular disease risk factors,” *Nutrition, Metabolism and*  
594 *Cardiovascular Diseases*, vol. 19, no. 10, pp. 720–728, 2009.
- 595 91. Y. Maneerat, K. Prasongsukarn, S. Benjathummarak, W. Dechkhajorn, and  
596 U. Chaisri, “Increased alpha-defensin expression is associated with risk of coro-  
597 nary heart disease: a feasible predictive inflammatory biomarker of coronary heart  
598 disease in hyperlipidemia patients,” *Lipids in Health and Disease*, vol. 15, p. 117,  
599 2016.
- 600 92. J. E. Pool, R. B. Corbett-Detig, R. P. Sugino, K. A. Stevens, C. M. Cardeno,  
601 M. W. Crepeau, P. Duchon, J. J. Emerson, P. Saelao, D. J. Begun, and C. H.  
602 Langley, “Population genomics of Sub-Saharan *Drosophila melanogaster*: African  
603 diversity and non-African admixture,” *PLoS Genetics*, vol. 8, no. 12, p. e1003080,  
604 2012.
- 605 93. T. F. C. Mackay, S. Richards, E. a. Stone, A. Barbadilla, J. F. Ayroles, D. Zhu,  
606 *et al.*, “The *Drosophila melanogaster* Genetic Reference Panel,” *Nature*, vol. 482,  
607 no. 7384, pp. 173–178, 2012.

**Supplementary Figure 1:** Summary of resampling results (case - control) for AMPs and other immunity genes for Tajima's  $D$ ,  $\pi$ , Watterson's  $\theta$ .

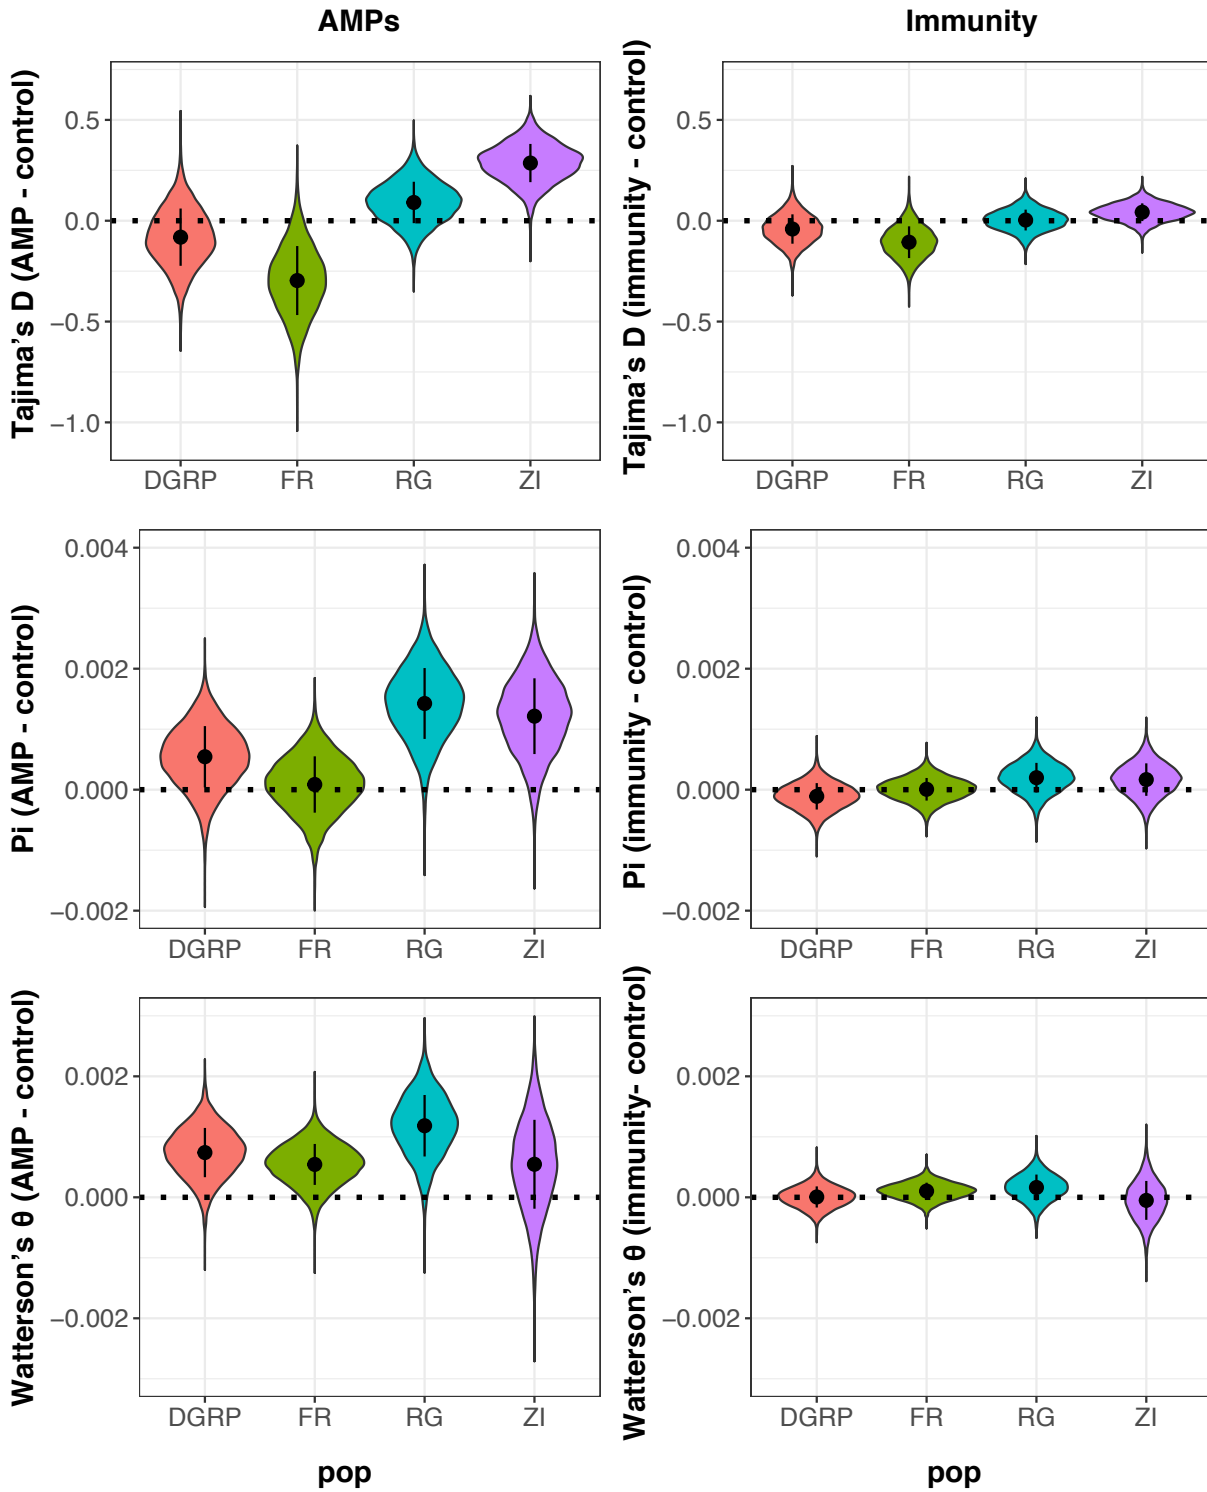

**Supplementary Figure 2:** Summary of resampling results (case - control) for AMPs for Tajima's  $D$ ,  $\pi$ , Watterson's  $\theta$ , using the subset of non-linked AMPs.

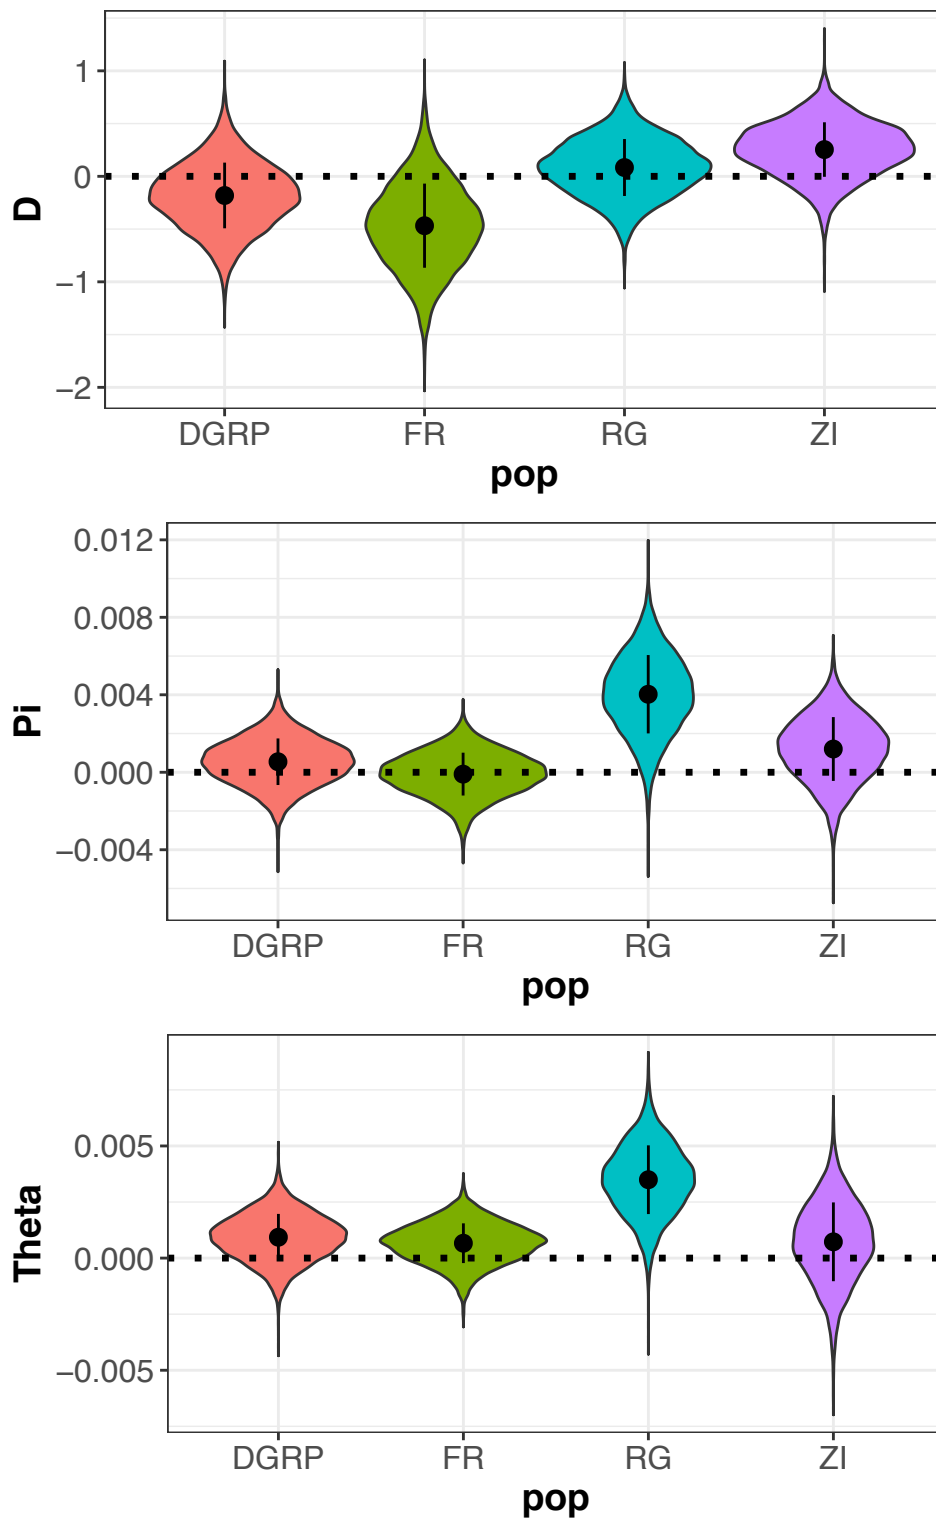

**Supplementary Figure 3:** Summary of resampling results (case - control) for AMPs and other immunity genes for Tajima's  $D$ ,  $\pi$ , Watterson's  $\theta$ , comparing the results of ZI and FR populations with and without SD chromosomes.

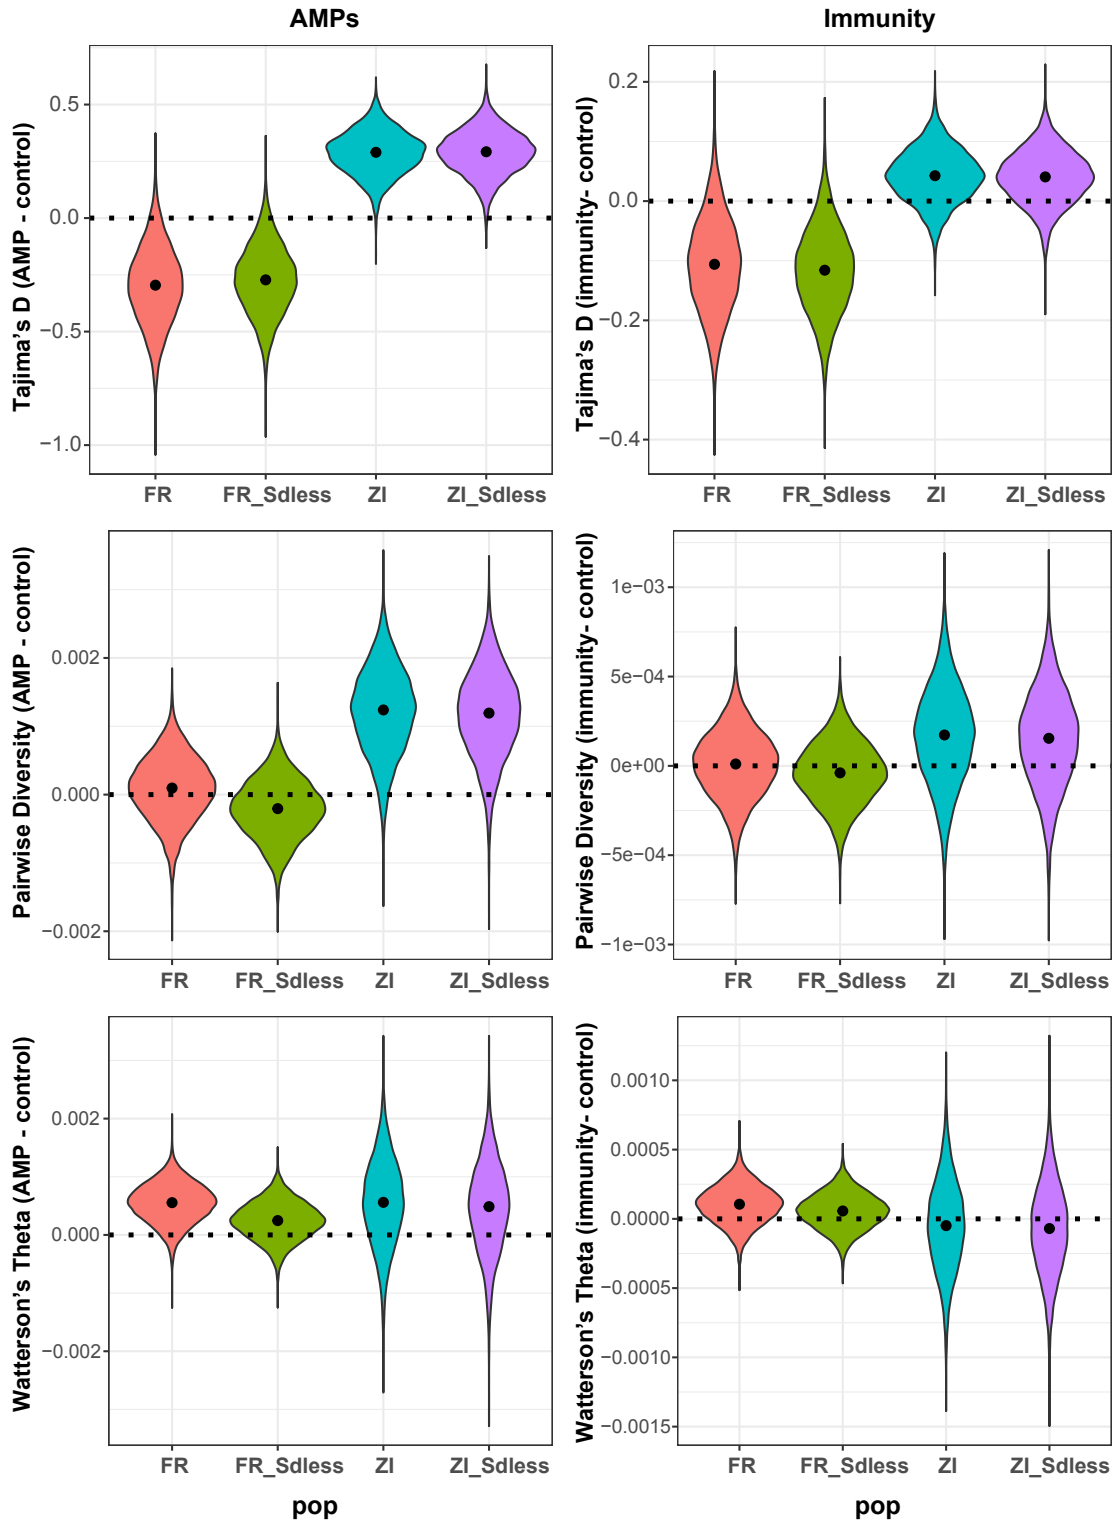



**Supplementary Figure 4:** Summary of resampling results (case - control) for AMPs and other immunity genes for Tajima's  $D$ ,  $\pi$ , Watterson's  $\theta$  in the *D. mauritiana* population.

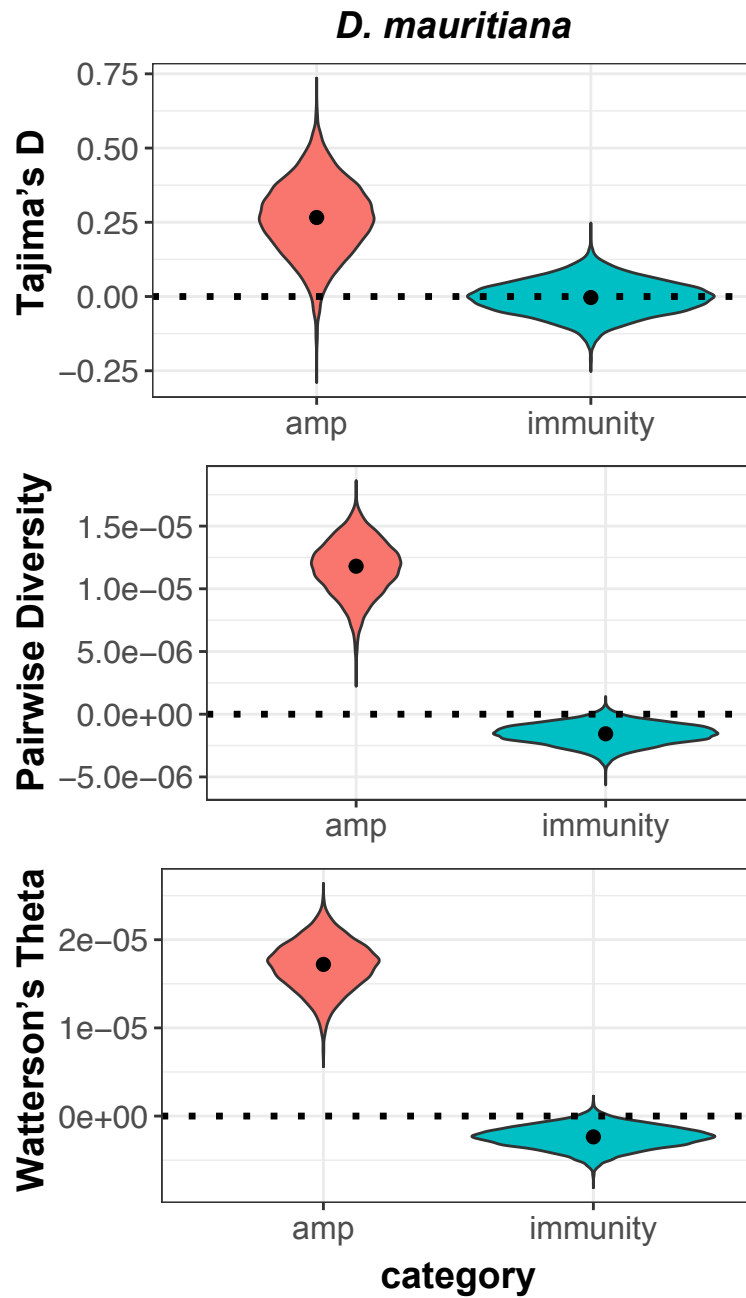

Source: http://biorxiv.org/content/10.1101/298893v1.full.pdf
